# Supplementary material for: Synthesis and properties of a new series of mesogenic compounds with pyridine, oxidopyridinium, thienyl and furyl moieties
Source: Royal Society of Chemistry journal article supplement (doi:10.1039/b007039o), 2001-01-01
Supplement: b007039o.doc [file b007039o.doc]

| n | summary | | Calculated | Found |
| --- | --- | --- | --- | --- |
| Series 3 | |  | | |
| 1 | C32H41NO4 | | C 76.31 %, H 8.20 %, N 2.78 % | C 76.68 %, H 8.30 %, N 2.97 % |
| 2 | C33H43NO4 | | C 76.55 %, H 8.37 %, N 2.72 % | C 76.94 %, H 8.10 %, N 2.55 % |
| 4 | C35H47NO4 | | C 77.03 %, H 8.68 %, N 2.57 % | C 77.33 %, H 8.98 %, N 2.78 % |
| 8 | C39H55NO4 | | C 77.83 %, H 9.21 %, N 2.33 % | C 77.99 %, H 9.33 %, N 2.53 % |
| Series 3a | |  | | |
| 2 | C35H47NO4 | | C 77.03 %, H 8.68 %, N 2.57 % | C 77.21 %, H 8.87 %, N 2.69 % |
| 3 | C36H49NO4 | | C 77.24 %, H 8.82 %, N 2.50 % | C 77.54 %, H 8.56 %, N 2.45 % |
| 4 | C37H51NO4 | | C 77.45 %, H 8.96 %, N 2.44 % | C 77.72 %, H 8.99 %, N 2.56 % |
| 5 | C38H53NO4 | | C 77.64 %, H 9.09 %, N 2.38 % | C 77.84 %, H 9.32 %, N 2.52 % |
| 6 | C39H55NO4 | | C 77.83 %, H 9.21 %, N 2.33 % | C 77.97 %, H 9.37 %, N 2.45 % |
| Compound 3b | |  | | |
|  | C39H55NO4 | | C 77.83 %, H 9.21 %, N 2.33 % | C 77.92 %, H 9.37 %, N 2.05 % |
| Compound 3c | |  | | |
|  | C32H41NO4 | | C 76.31 %, H 8.20 %, N 2.78 % | C 76.35 %, H 8.31 %, N 2.92 % |
| Compound 3d | |  | | |
|  | C32H41NO4 | | C 76.31 %, H 8.20 %, N 2.78 % | C 76.30 %, H 8.28 %, N 2.82 % |
| Series 4a | |  | | |
| 2 | C31H39NO4 | | C 76.04 %, H 8.03 %, N 2.86 % | C 76.32 %, H 8.12 %, N 2.92 % |
| 3 | C32H41NO4 | | C 76.31 %, H 8.20 %, N 2.78 % | C 76.45 %, H 8.43 %, N 2.95 % |
| 4 | C33H43NO4 | | C 76.56 %, H 8.37 %, N 2.71 % | C 76.76 %, H 8.54 %, N 2.93 % |
| 5 | C34H45NO4 | | C 76.80 %, H 8.53 %, N 2.63 % | C 76.92 %, H 8.67 %, N 2.87 % |
| 6 | C35H47NO4 | | C 77.03 %, H 8.68 %, N 2.57 % | C 77.23 %, H 8.87 %, N 2.76 % |
| Series 5 | |  | | |
| 1 | C32H41NO5 | | C 73.99 %, H 7.90 %, N 2.70 % | C 74.15 %, H 7.80 %, N 2.92 % |
| 4 | C35H47NO5 | | C 74.84 %, H 8.43 %, N 2.49 % | C 74.98 %, H 8.60 %, N 2.57 % |
| 8 | C39H55NO5 | | C 75.81 %, H 8.97 %, N 2.27 % | C 77.93 %, H 9.09 %, N 2.36 % |
| Series 6 | |  | | |
| 4 | C­­­29H36SO4 | | C 72.47%, H 7.55%, S 6.67% | C 72.67%, H 7.77%, S 6.83% |
| 8 | C­­­33H44SO4 | | C 73.85%, H 8.26%, S 5.97% | C 73.97%, H 8.45%, S 5.90% |
| Series 7 | |  | | |
| 1 | C­­­31H40SO4 | | C 73.19 %, H 7.93 %, S 6.30 % | C 73.37 %, H 7.99 %, S 6.54 % |
| 4 | C­­­34H46SO4 | | C 74.14 %, H 8.42 %, S 5.82 % | C 74.28 %, H 8.57 %, S 5.93 % |
| 8 | C­­­38H54SO4 | | C 72.20 %, H 8.97 %, S 5.29 % | C 72.38 %, H 9.13 %, S 5.43 % |
| Series 7a | |  | | |
| 2 | C­­­34H46SO4 | | C 74.14 %, H 8.42 %, S 5.82 % | C 74.32 %, H 8.57 %, S 5.94 % |
| 3 | C­­­35H48SO4 | | C 74.43 %, H 8.57 %, S 5.67 % | C 74.81 %, H 8.77 %, S 5.91 % |
| 4 | C­­­36H50SO4 | | C 74.70 %, H 8.72 %, S 5.54 % | C 74.84 %, H 8.92 %, S 5.69 % |
| 5 | C­­­37H52SO4 | | C 74.96 %, H 8.86 %, S 5.41 % | C 75.09 %, H 8.99 %, S 5.67 % |
| 6 | C­­­38H54SO4 | | C 72.20 %, H 8.97 %, S 5.29 % | C 72.39 %, H 9.11 %, S 5.37 % |
| Series 8 | |  | | |
| 1 | C31H40O5 | | C 75.58 %, H 8.18 % | C 75.77 %, H 8.32 % |
| 4 | C34H46O5 | | C 76.37 %, H 8.67 % | C 76.53 %, H 8.83 % |
| 8 | C38H54O5 | | C 77.25 %, H 9.21 % | C 77.56 %, H 9.33 % |
